# Supplementary material for: Carbon dots reduced and stabilized silver nanoclusters: synthesis and formation mechanisms
Source: Royal Society of Chemistry journal article supplement (doi:10.1039/c6ra14233h), 2016-01-01
Supplement: c6ra14233h1.pdf [file c6ra14233h1.pdf]

## **Carbon dots reduced and stabilized silver nanoclusters: synthesis and formation mechanisms**

Jian-Cheng Jin<sup>1,2</sup>, Zi-Qiang Xu<sup>1,2,3</sup>, Han-Feng Zou<sup>1,2</sup>, Zhi-Qiang Zhou<sup>1,2</sup>, Qi-Qi  
Yang<sup>1,2</sup>, Bei-Bei Wang<sup>1,2</sup>, Feng-Lei Jiang<sup>1,2</sup>, Yi Liu<sup>1,2\*</sup>

<sup>1</sup> State Key Laboratory of Virology & Key Laboratory of Analytical Chemistry for  
Biology and Medicine (Ministry of Education), College of Chemistry and Molecular  
Sciences, Wuhan University, Wuhan 430072, P. R. China

<sup>2</sup> Key Laboratory of Analytical Chemistry for Biology and Medicine (Ministry of  
Education), College of Chemistry and Molecular Sciences, Wuhan University, Wuhan  
430072, P. R. China

<sup>3</sup> Hubei Collaborative Innovation Center for Advanced Organic Chemical Materials,  
Ministry-of-Education Key Laboratory for the Green Preparation and Application of  
Functional Materials, Hubei Province Key Laboratory of Industrial Biotechnology,  
Faculty of Materials Science & Engineering, Hubei University, Wuhan, 430062, P. R.  
China.

## **Table of contents in supporting information**

1. Experimental procedures.
2. PL spectra and photographs of the control experiments (Figure S1).
3. PL and UV-vis spectra of supernatant liquid of AgNCs synthesis (Figure S2).
4. High resolution XPS spectra of S 2p peak for CDs and AgNCs (Figure S3).
5. Time resolution of UV-vis spectra for AgNCs synthesis (Figure S4).
6. Effects of reaction time, concentration of ammonia, temperature, concentration ratio between CDs and silver nitrate on the synthesis of AgNCs. (Figure S5).
7. Time resolution of UV-vis spectra for AgNCs synthesis in isopropanol (Figure S6).
8. PL spectra and TEM images of AgNCs synthesized in isopropanol (Figure S7).

## **S1. Experimental procedures**

**Synthesis of carbon dots (CDs):** CDs were synthesized according to our previous report.<sup>1</sup> In particular, 4 g sucrose and 3 g mercaptosuccinic acid were heated at their melting point for 6 min. After cooling, the supernatant liquid was discarded and the solid product was obtained at the bottom of flask. The precipitates were dispersed with water and then extracted with ether several times in order to remove the remained oleic acid. Finally, the products were freeze-dried and obtained after dialyzed in deionized water using a 1 kDa membrane for 1 day.

**Synthesis of silver nanoclusters (AgNCs):** Typically, 40 mL ethanol was boiled to 80 °C, the as prepared CDs (100 µL, 50 mg/mL) were added under stirring. Then, silver nitrate (2 mL, 3.42 mg/mL) was added subsequently after ammonia (0.4 mL, 10%) injected. The reaction was processed for 48 h and cooled to room temperature. Then, the mixture was centrifuged and the AgNCs precipitates were washed with ethanol, tetrahydrofuran, dichloromethane three times to remove the remained silver nitrate and CDs. Finally, the AgNCs precipitates were dried in vacuum oven.

**UV-vis spectra:** UV-vis spectra were measured with a MAPADA double-beam spectrophotometer at room temperature.

**Fluorescence spectroscopy:** Fluorescence analysis were carried out using a LS-55 fluorophotometer (Perkin-Elmer, USA).

**Fourier transform infrared (FTIR) spectra:** FTIR spectra were recorded by Thermo (USA) FTIR spectrophotometer. KBr crystals were used as the matrix for sample preparation.

***X-ray photoelectron spectroscopy (XPS) analysis:*** XPS experiments were carried out on KRATOS XSAM800 X-ray photoelectron spectrometer using Mg as the exciting source.

***Transmission electron microscopy (TEM) and energy dispersive X-ray spectroscopy (EDX):*** TEM images and EDX analysis were done on a JEOL JEM-2100 electron microscope operating at 200 kV. A diluted solution was spotted on carbon coated copper grid and then dried in laboratory ambience.

## S2. Supplementary figures

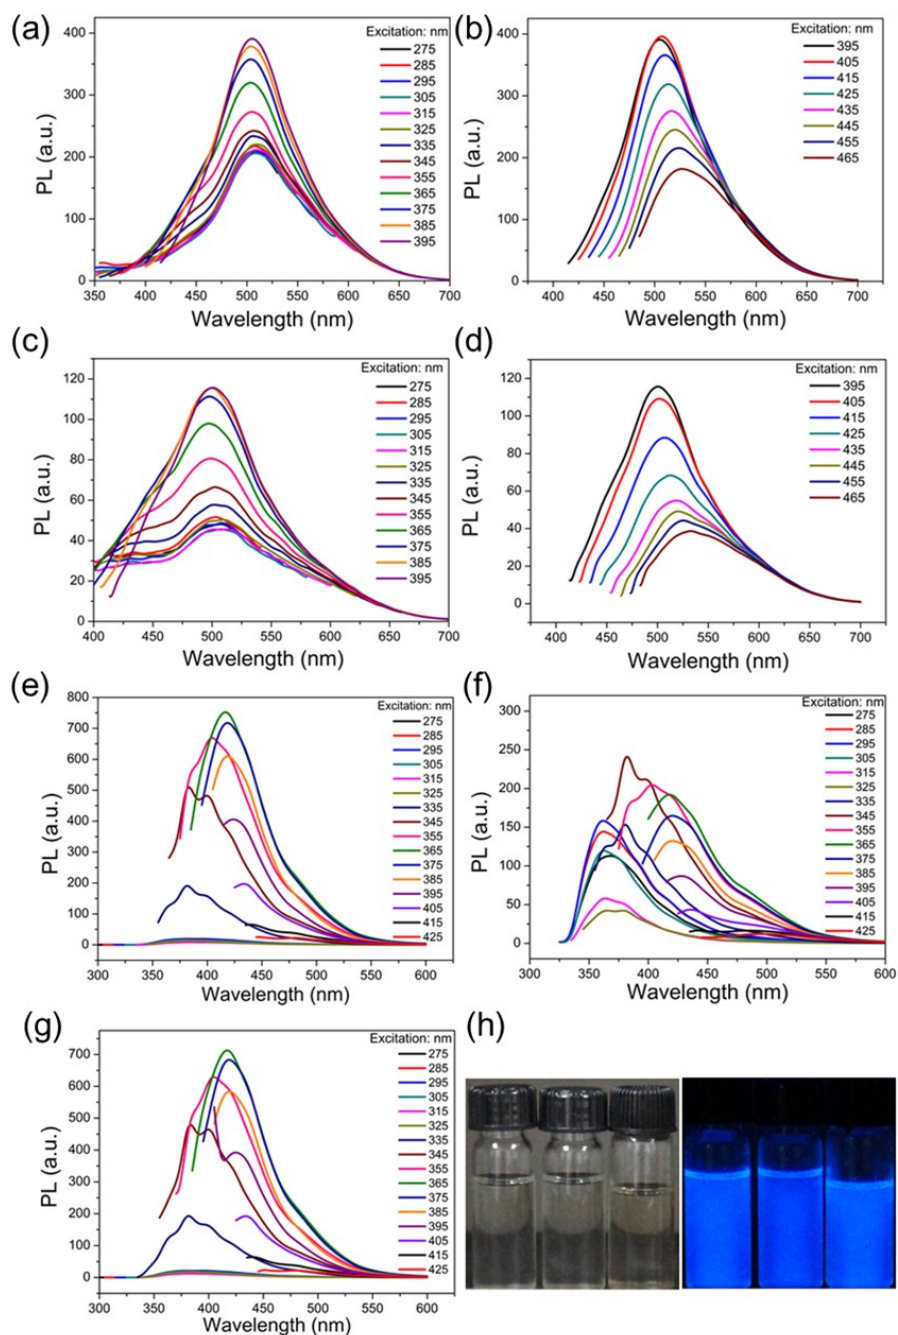

**Figure S1.** PL spectra and photographs of the control experiments. (a) and (b) PL spectra of C-dots in ethanol at room temperature. (c) and (d) PL spectra of C-dots in ethanol with ammonia at room temperature. (e), (f), (g) PL spectra of C-dots boiled for 48 h in ethanol, ethanol with ammonia, ethanol with sodium hydroxide, respectively. (h) Photographs of liquid for (e), (f), (g) in daylight and under exposure

at 365 nm UV light.

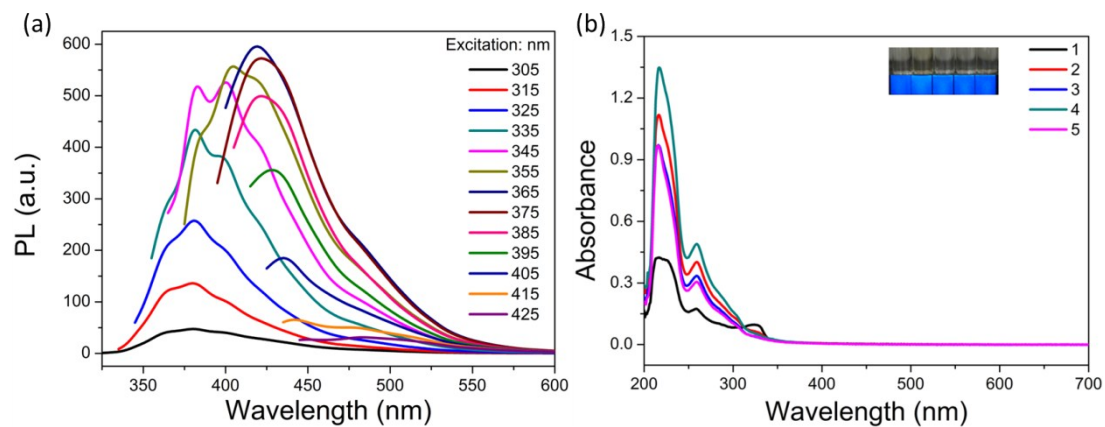

**Figure S2.** (a) PL spectra of supernatant liquid of AgNCs synthesis by using 400  $\mu\text{L}$  10% ammonia in 40 mL ethanol. (b) UV-vis spectra of supernatant liquid of AgNCs synthesis. (1, C-dots boiled in ethanol. 2, 3, 4, 5, supernatant liquid of AgNCs synthesis using 400  $\mu\text{L}$  5, 10, 15, 20% ammonia in 40 mL ethanol.) The inserts from left to right are the corresponding photographs of liquid for 1-5 in daylight and under exposure at 365 nm UV light.

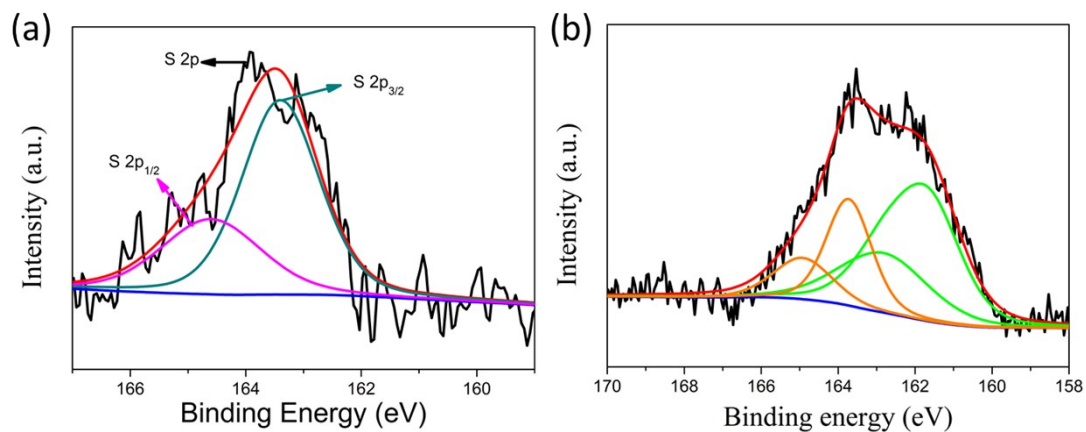

**Figure S3.** The high resolution XPS spectrum of S 2p peak for CDs (a) and AgNCs (b). The S 2p<sub>3/2</sub>–S 2p<sub>1/2</sub> peaks were fitted using one S 2p doublet with a 2:1 area ratio and a splitting of 1.2 eV.<sup>2</sup> The green and orange peaks were attributed to S-Ag and S-C bond, respectively.  $\chi^2$  for the fit shown in (b) was 0.28.



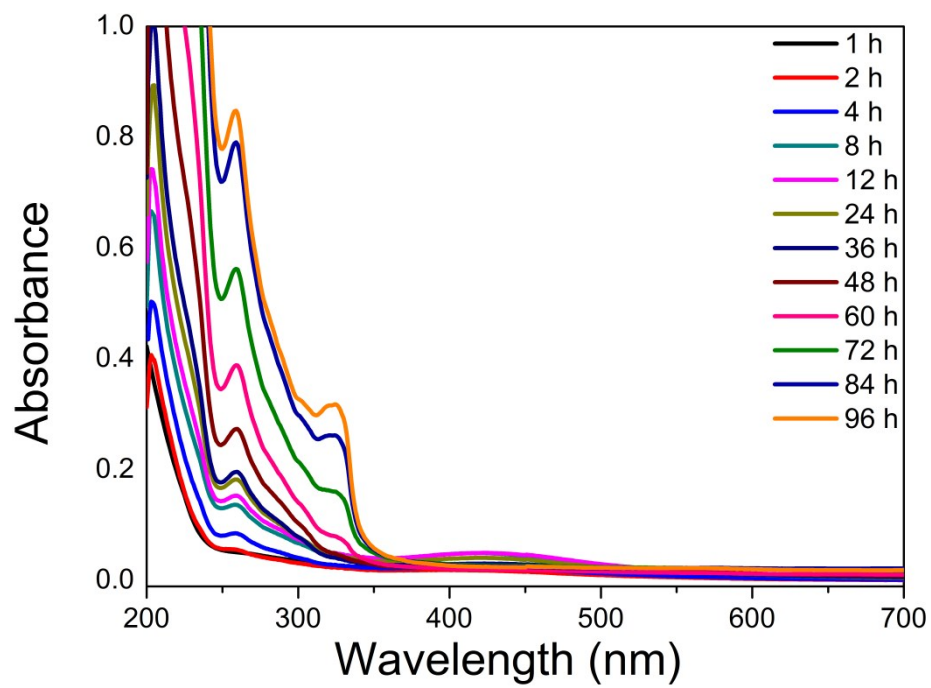

**Figure S4.** Time resolution of UV-vis spectra for AgNCs synthesis.

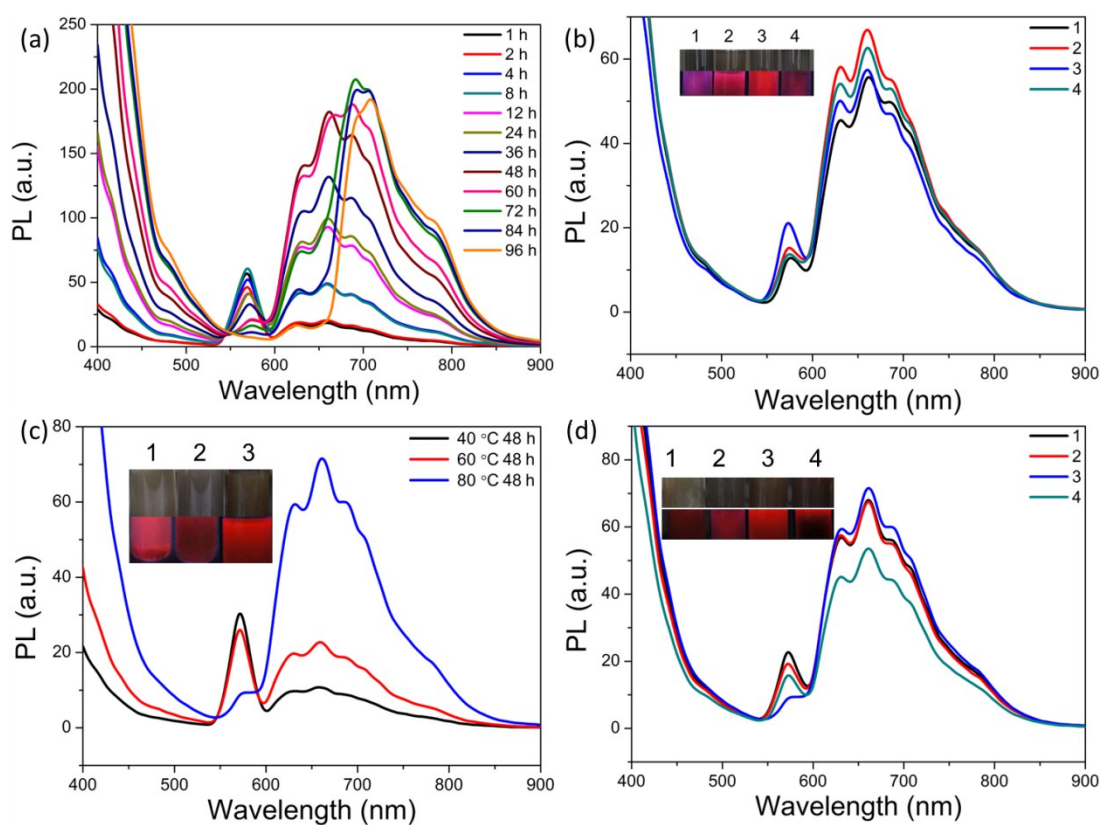

**Figure S5.** (a) Time resolution of PL spectra for AgNCs synthesis. (b) PL property of AgNCs by varying the concentration of ammonia (1-4: 400  $\mu$ L 5%, 10%, 15%, 20% ammonia in 40 mL ethanol). (c) PL spectra for AgNCs with different synthesis temperature. (d) PL spectra of the as prepared AgNCs with different concentration ratio between C-dots and silver ion (1-4: 0.625, 1.25, 2.5, 5 mg CDs with 2 mL 3.42 mg/mL silver nitrate and 400  $\mu$ L 10% ammonia in 40 mL ethanol at 80  $^{\circ}$ C for 48 h). The inserts are the corresponding photographs of the products for in daylight and under exposure at 365 nm UV light.

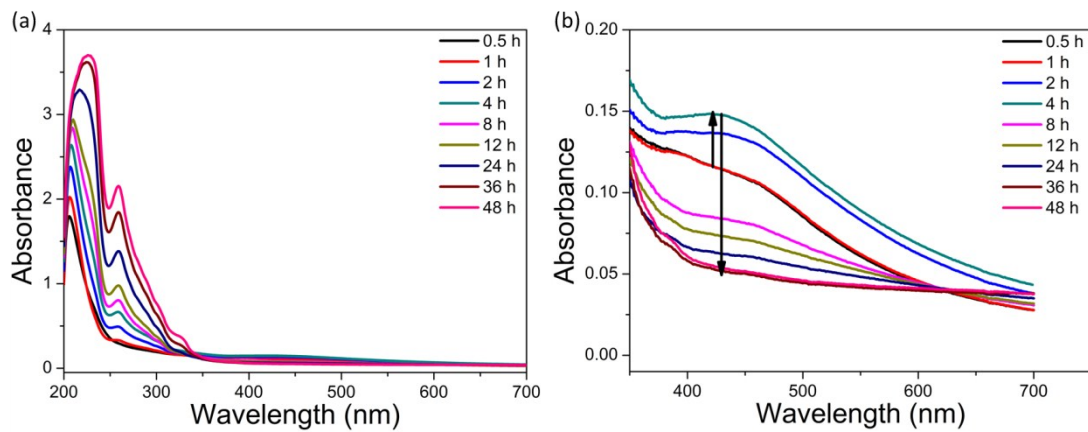

**Figure S6.** (a) and (b) Time resolution of UV-vis spectra for AgNCs synthesis in isopropanol.

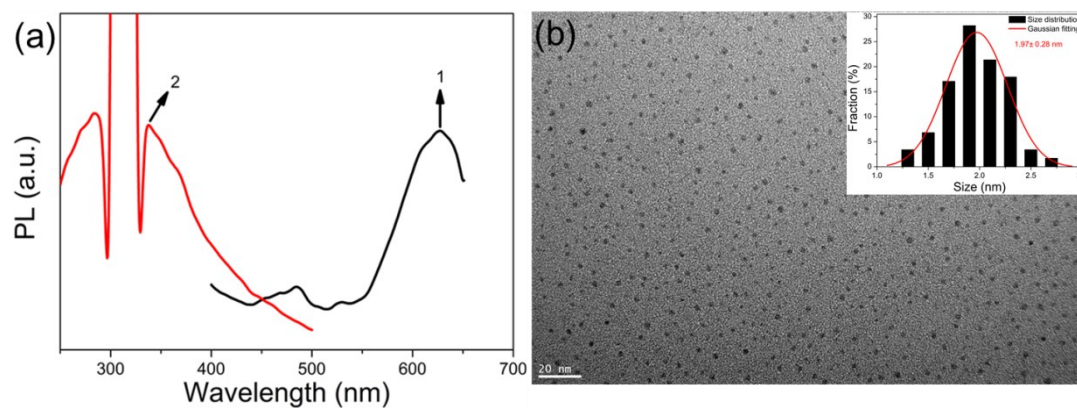

**Figure S7.** (a) 1, Emission spectra; 2, Excitation spectra of AgNCs synthesized in isopropanol. (b) TEM image of AgNCs synthesized in isopropanol. The inset is the size distribution of the as prepared AgNCs.

#### References:

1. Jin, J.-C.; Xu, Z.-Q.; Dong, P.; Lai, L.; Lan, J.-Y.; Jiang, F.-L.; Liu, Y. *Carbon* **2015**, 94, 129-141.
2. Arena, G.; Contino, A.; D'Agata, R.; Sgarlata, C.; Spoto, G. *New Journal of Chemistry* **2005**, 29, 1393-1395.
